# Supplementary material
Source: publisher site journal article supplement (https://www.spandidos-publications.com/2426/downloadSupplementary)
Supplement: Supplementary file 1 [file downloadSupplementary]

## Sheet: GO
Table SVI. GO Analysis of Proteins between BPA and control group.
Term Type	GO Term	GO ID	BPA num	BPA percent
cellular_component	cell part	GO:0044464	456	456/481
cellular_component	cell	GO:0005623	456	456/481
biological_process	cellular process	GO:0009987	445	445/481
molecular_function	binding	GO:0005488	431	431/481
cellular_component	organelle	GO:0043226	430	430/481
biological_process	single-organism process	GO:0044699	416	416/481
cellular_component	organelle part	GO:0044422	366	366/481
biological_process	metabolic process	GO:0008152	365	365/481
biological_process	biological regulation	GO:0065007	353	353/481
biological_process	regulation of biological process	GO:0050789	336	336/481
cellular_component	membrane	GO:0016020	331	331/481
biological_process	response to stimulus	GO:0050896	300	300/481
biological_process	cellular component organization or biogenesis	GO:0071840	273	273/481
biological_process	localization	GO:0051179	263	263/481
molecular_function	catalytic activity	GO:0003824	259	259/481
cellular_component	macromolecular complex	GO:0032991	249	249/481
cellular_component	membrane part	GO:0044425	236	236/481
biological_process	multicellular organismal process	GO:0032501	222	222/481
cellular_component	membrane-enclosed lumen	GO:0031974	219	219/481
biological_process	developmental process	GO:0032502	210	210/481
biological_process	signaling	GO:0023052	200	200/481
biological_process	positive regulation of biological process	GO:0048518	198	198/481
cellular_component	extracellular region	GO:0005576	177	177/481
biological_process	negative regulation of biological process	GO:0048519	173	173/481
cellular_component	extracellular region part	GO:0044421	164	164/481
biological_process	immune system process	GO:0002376	118	118/481
biological_process	multi-organism process	GO:0051704	94	94/481
molecular_function	molecular function regulator	GO:0098772	77	77/481
molecular_function	transporter activity	GO:0005215	69	69/481
biological_process	locomotion	GO:0040011	68	68/481
cellular_component	cell junction	GO:0030054	62	62/481
molecular_function	structural molecule activity	GO:0005198	62	62/481
biological_process	biological adhesion	GO:0022610	56	56/481
molecular_function	signal transducer activity	GO:0004871	48	48/481
biological_process	reproduction	GO:0000003	46	46/481
biological_process	reproductive process	GO:0022414	46	46/481
biological_process	growth	GO:0040007	42	42/481
cellular_component	supramolecular complex	GO:0099080	38	38/481
molecular_function	nucleic acid binding transcription factor activity	GO:0001071	37	37/481
molecular_function	molecular transducer activity	GO:0060089	36	36/481
cellular_component	synapse	GO:0045202	34	34/481
cellular_component	synapse part	GO:0044456	28	28/481
biological_process	behavior	GO:0007610	25	25/481
molecular_function	transcription factor activity, protein binding	GO:0000988	23	23/481
molecular_function	antioxidant activity	GO:0016209	9	9/481
biological_process	rhythmic process	GO:0048511	8	8/481
biological_process	presynaptic process involved in chemical synaptic transmission	GO:0099531	7	7/481
cellular_component	other organism	GO:0044215	7	7/481
cellular_component	other organism part	GO:0044217	7	7/481
molecular_function	electron carrier activity	GO:0009055	7	7/481
biological_process	detoxification	GO:0098754	6	6/481
cellular_component	virion	GO:0019012	6	6/481
cellular_component	nucleoid	GO:0009295	6	6/481
cellular_component	virion part	GO:0044423	6	6/481
biological_process	cell killing	GO:0001906	4	4/481
molecular_function	translation regulator activity	GO:0045182	2	2/481
molecular_function	chemoattractant activity	GO:0042056	2	2/481
molecular_function	nutrient reservoir activity	GO:0045735	1	1/481
molecular_function	metallochaperone activity	GO:0016530	1	1/481
